# Supplementary material for: Integrative analysis reveals CD38 as a therapeutic target for plasma cell-rich pre-disease and established rheumatoid arthritis and systemic lupus erythematosus
Source: Springer Nature journal article supplement (doi:10.1186/s13075-018-1578-z), 2018-05-02

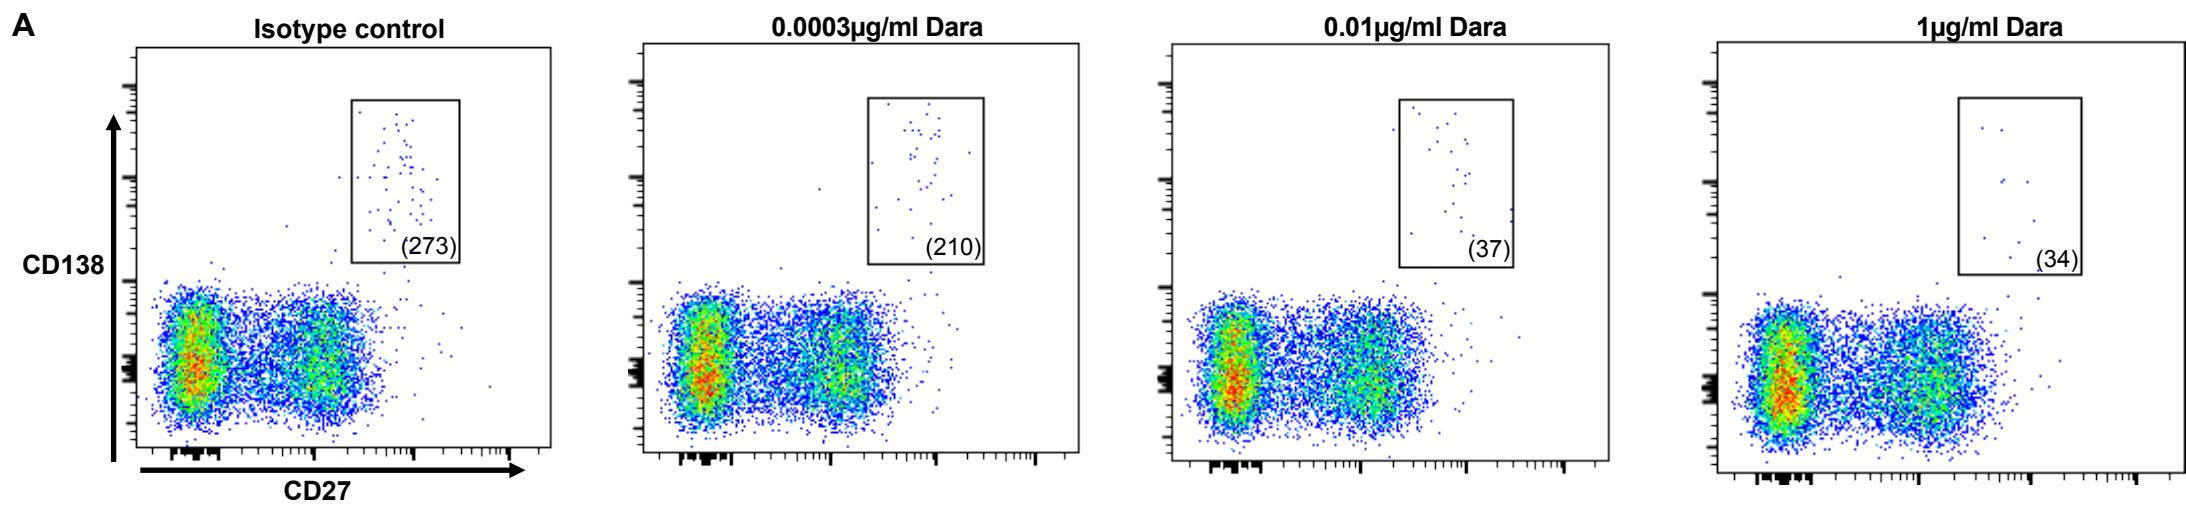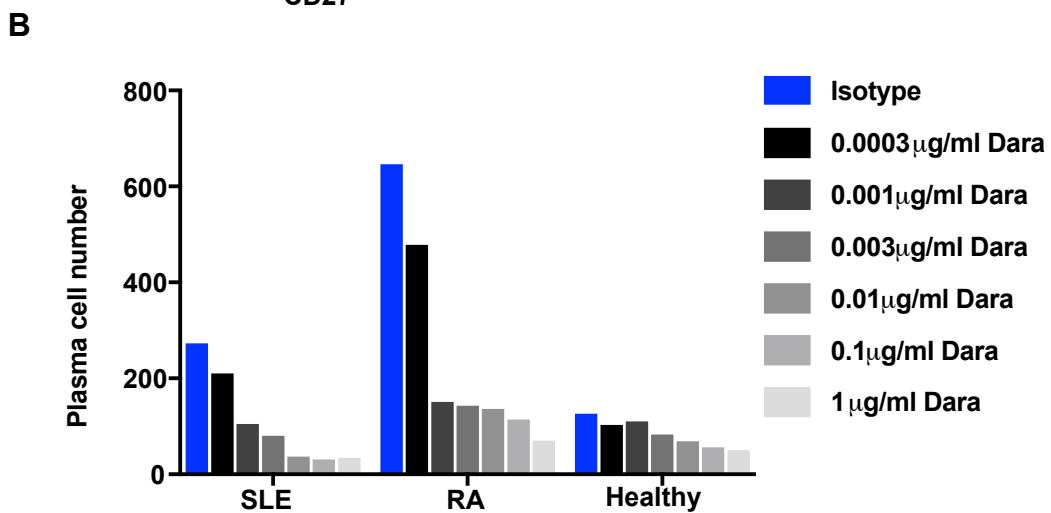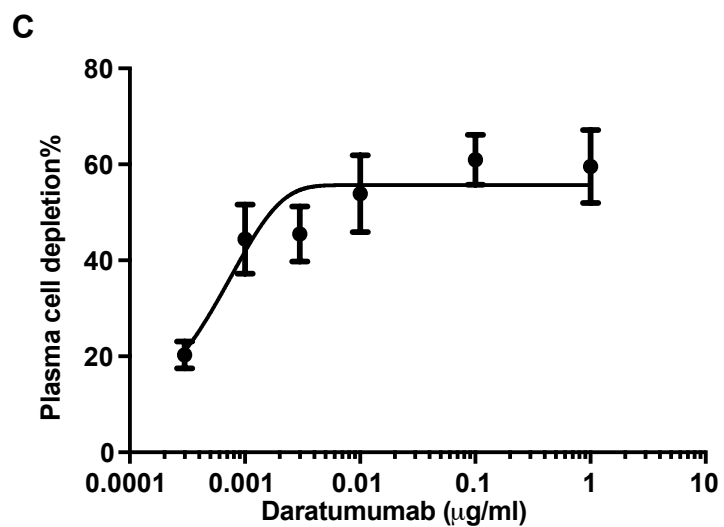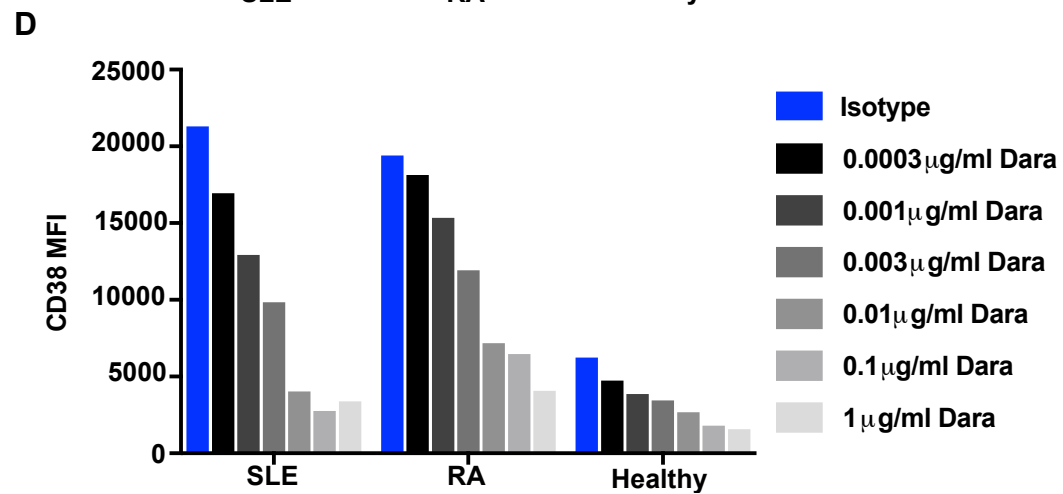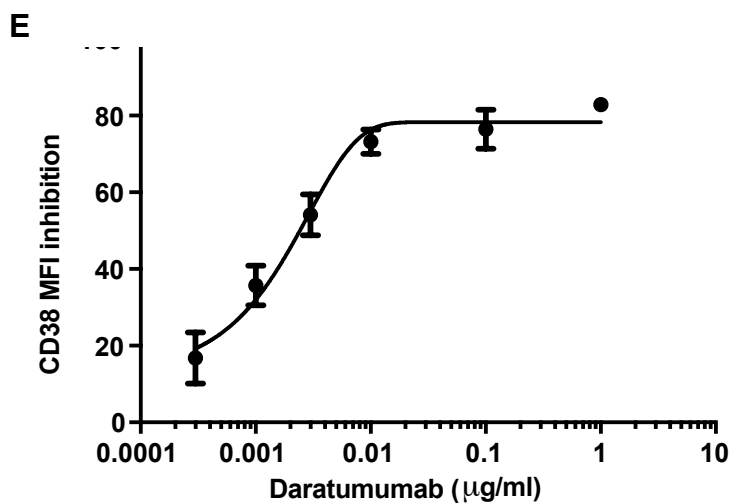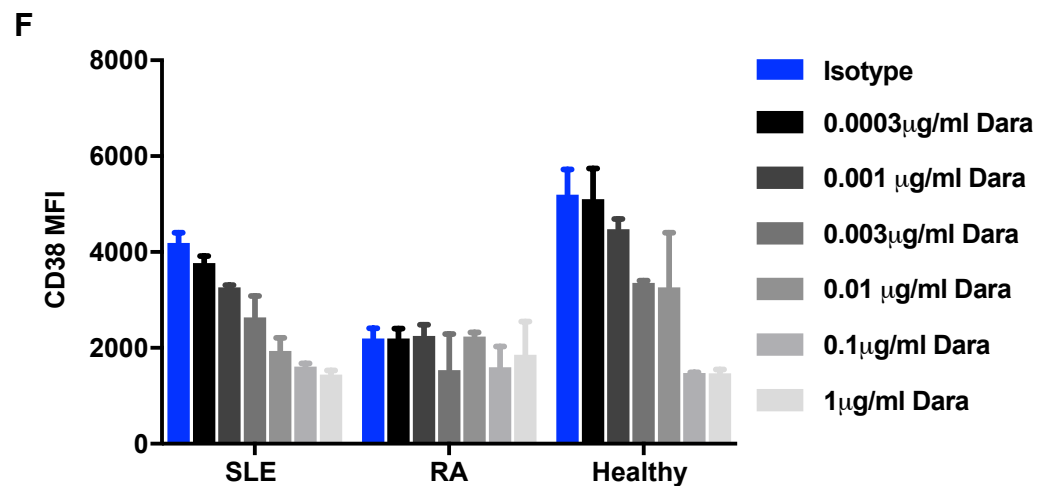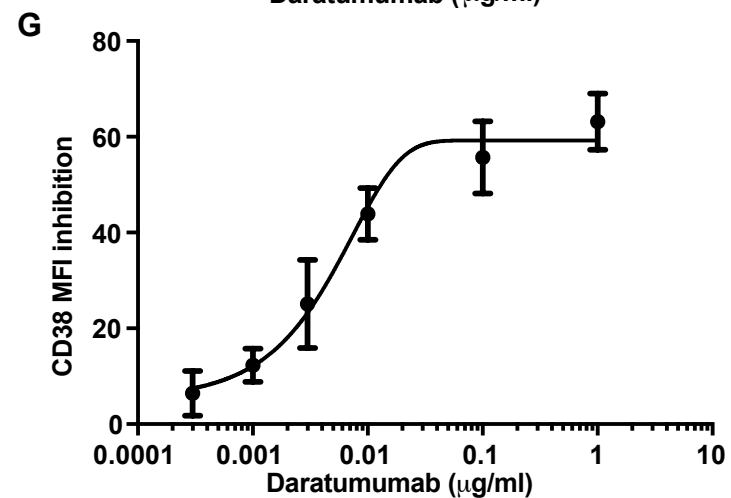

Supplement: MOESM1 [file 15733480]
